# Supplementary material for: Biodegradation of PBAT and PHB/PBAT by Aspergillus and Purpureocillium isolates
Source: Research Square preprint supplement (doi:10.21203/rs.3.rs-6829190/v1), 2025-07-25
Supplement: Supplementary file 1 [file 9864986a30cda7275059aa69.docx]

Supplementary material


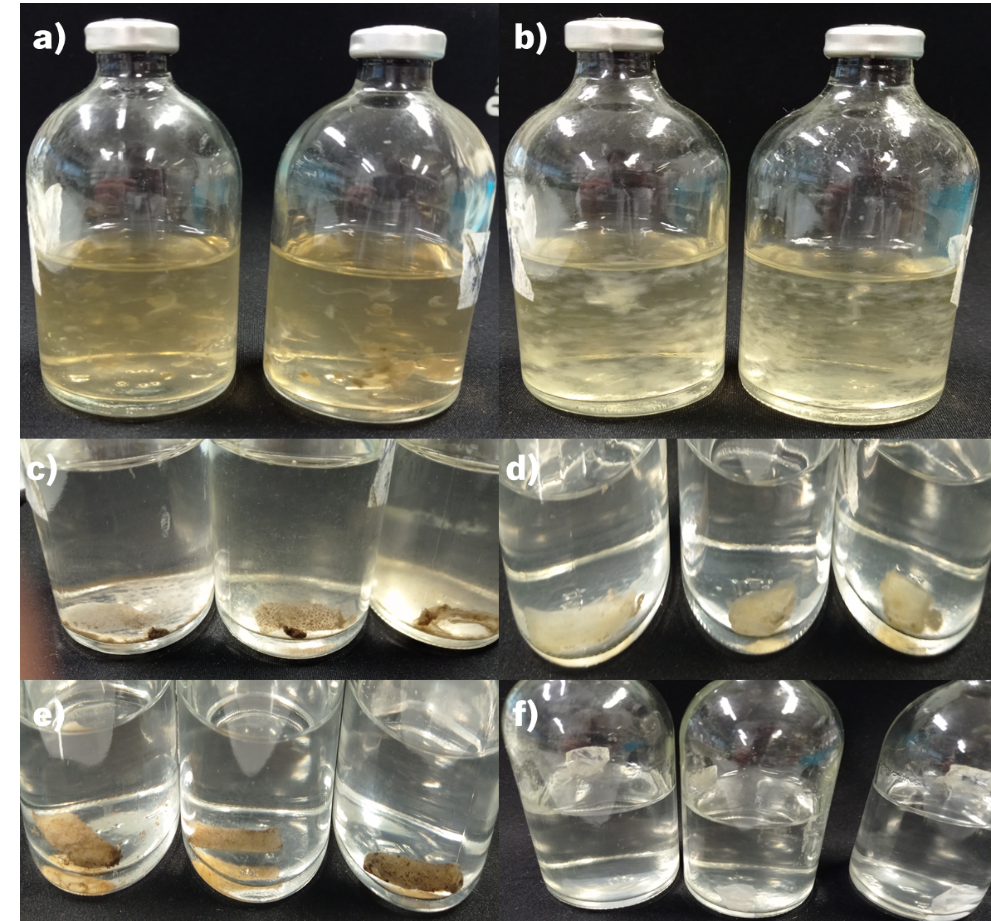


**Figure S1** Glass bottles at the end of the BOD experiment. a) positive control Aspergillus, b) positive control Purpureocillium lilacinum, c) PBAT film incubated with Aspergillus spores, d) PBAT film incubated with Purpureocillium lilacinum spores, e) PBAT film incubated with Aspergillus and Purpureocillium lilacinum spores, f) Negative control. 3

**Table S1** Enzymes from Aspergillus (tax ID 5052) identified with the models as potential PBAT degrading enzymes **8**

| ***Aspergillus*** | | | | |  |
| --- | --- | --- | --- | --- | --- |
| **Uniprot ID** | **Protein names** | **Gene Names** | **Microorganism** | **Number of HMMs that identify the protein** |  |
|  |
| A0A0S7DIL9 | Acyltransferase LovD | ALT_007513 ALT_1039 CNMCM8694_000671 CNMCM8927_000961 IFM58399_09935 | *Aspergillus lentulus* | 2 |  |
| A0A0S7DM50 | Acyltransferase LovD | ALT_004496 ALT_2338 | *Aspergillus lentulus* | 2 |  |
| A0A401KPS9 | Acyltransferase LovD | AAWM_04188 | *Aspergillus awamori* (Black koji mold) | 2 |  |
| A0A0S7E3V8 | Acyltransferase LovD | ALT_005586 ALT_6577 | *Aspergillus lentulus* | 2 |  |
| A0A8H3NPK1 | Acyltransferase LovD | IFM58399_03661 | *Aspergillus lentulus* | 2 |  |
| A0A8H3NSS9 | Acyltransferase LovD | IFM58399_05347 | *Aspergillus lentulus* | 2 |  |
| A0A0S7EAM4 | Acyltransferase LovD | ALT_009104 ALT_9162 | *Aspergillus lentulus* | 2 |  |
| A0A401KQW7 | Acyltransferase LovD | AAWM_04571 | *Aspergillus awamori* (Black koji mold) | 1 |  |
| Q4X078 | Cutinase | AFUA_2G14420 | *Aspergillus fumigatus* (strain ATCC MYA-4609 / CBS 101355 / FGSC A1100 / Af293) *(Neosartorya fumigata)* | 10 |  |
| B0XU21 | Cutinase | AFUB_030040 | *Aspergillus fumigatus* (strain CBS 144.89 / FGSC A1163 / CEA10) *(Neosartorya fumigata)* | 10 |  |
| A0A0J5Q122 | Cutinase | Y699_02431 | *Aspergillus fumigatus* Z5 | 10 |  |
| A0A229XEA7 | Cutinase | CDV57_08447 | *Aspergillus fumigatus (Neosartorya fumigata)* | 10 |  |
| A0A8H4HRU2 | Cutinase | CNMCM8057_000710 CNMCM8686_001394 | *Aspergillus fumigatus (Neosartorya fumigata)* | 10 |  |
| A0A2I1CNR1 | Cutinase | P174DRAFT_416947 | *Aspergillus novofumigatus* (strain IBT 16806) | 11 |  |
| A0A8E0QLK6 | Cutinase | Aud_001396 | *Aspergillus udagawae* | 11 |  |
| A0A8H3P8C7 | Cutinase | IFM46972_07634 | *Aspergillus udagawae* | 11 |  |
| A0A8H3RNC9 | Cutinase | IFM51744_02137 | *Aspergillus udagawae* | 11 |  |
| A1DHZ6 | Cutinase | NFIA_089600 | *Neosartorya fischeri* (strain ATCC 1020 / DSM 3700 / CBS 544.65 / FGSC A1164 / JCM 1740 / NRRL 181 / WB 181) *(Aspergillus fischerianus)* | 10 |  |
| A0A0S7DLJ4 | Cutinase | ALT_000413 ALT_3654 CNMCM8927_005995 IFM58399_01988 | *Aspergillus lentulus* | 11 |  |
| A0A8H4DS61 | Cutinase | CNMCM8694_006007 | *Aspergillus lentulus* | 10 |  |
| A0A8H4GLD0 | Cutinase | CNMCM6457_009834 CNMCM6805_008258 | *Aspergillus fumigatiaffinis* | 10 |  |
| A0A8H6VF49 | Cutinase | CNMCM7691_005853 | *Aspergillus felis* | 10 |  |
| A0A8H6QJA3 | Cutinase | CNMCM5623_006340 | *Aspergillus felis* | 10 |  |
| A0A397HAF0 | Cutinase | CDV56_103901 | *Aspergillus thermomutatus* | 10 |  |
| A0A397IAC0 | Cutinase | CDV55_105853 | *Aspergillus turcosus* | 10 |  |
| A0A8H6PSV7 | Cutinase | CNMCM5793_008719 CNMCM6106_007116 | *Aspergillus hiratsukae* | 10 |  |
| A0A5N5X5V7 | Cutinase | BDV29DRAFT_115338 | *Aspergillus leporis* | 9 |  |
| A0A5N6VZP6 | Cutinase | BDV41DRAFT_577530 | *Aspergillus transmontanensis* | 9 |  |
| A0A5N6DS80 | Cutinase | BDV34DRAFT_222845 | *Aspergillus parasiticus* | 9 |  |
| A0A1F8AGU1 | Cutinase | ABOM_000098 | *Aspergillus bombycis* | 9 |  |
| A0A5N6I1F2 | Cutinase | BDV32DRAFT_150394 | *Aspergillus pseudonomiae* | 9 |  |
| A0A5N7DF90 | Cutinase | BDV37DRAFT_282875 | *Aspergillus pseudonomiae* | 9 |  |
| A0A5N6V3B7 | Cutinase | BDV40DRAFT_297494 | *Aspergillus tamarii* | 9 |  |
| A0A5N6HAQ8 | Cutinase | BDV35DRAFT_388317 | *Aspergillus flavus* | 9 |  |
| A0A1S9DXD5 | Cutinase | OAory_01023230 | *Aspergillus oryzae (*Yellow koji mold) | 8 |  |
| A0A2G7FNS7 | Cutinase | AARAC_000081 | *Aspergillus arachidicola* | 8 |  |
| A0A5N6SX09 | Cutinase | BDV38DRAFT_242995 | *Aspergillus pseudotamarii* | 9 |  |
| A0A2V5J821 | Cutinase | BP00DRAFT_390567 | *Aspergillus indologenus* CBS 114.80 | 10 |  |
| A0A1L9R9P1 | Cutinase | ASPWEDRAFT_698165 | *Aspergillus wentii* DTO 134E9 | 10 |  |
| A0A5N6G778 | Cutinase | BDW43DRAFT_306927 | *Petromyces alliaceus (Aspergillus alliaceus)* | 9 |  |
| A0A8H5ZVY6 | Cutinase | ETB97_007710 | *Aspergillus burnettii* | 9 |  |
| A0A7U2QUE1 | Cutinase | F9C07_2147579 | *Aspergillus flavus* | 9 |  |
| A0A5N7EMN1 | Cutinase | BDV36DRAFT_294153 | *Aspergillus pseudocaelatus* | 9 |  |
| A0A3M7JPB3 | Cutinase | CA14_003198 | *Aspergillus flavus* | 9 |  |
| A0A5N6JC83 | Cutinase | BDV30DRAFT_236157 | *Aspergillus minisclerotigenes* | 9 |  |
| A0A017SIZ4 | Cutinase | EURHEDRAFT_475414 | *Aspergillus ruber* (strain CBS 135680) | 11 |  |
| Q0CZ47 | cutinase | ATEG_01037 | *Aspergillus terreus* (strain NIH 2624 / FGSC A1156) | 9 |  |
| A0A317UNN0 | Cutinase | BO83DRAFT_442457 | *Aspergillus eucalypticola* (strain CBS 122712 / IBT 29274) | 8 |  |
| A0A5M3YKQ3 | cutinase | ATEIFO6365_0001004900 ATETN484_0001004800 | *Aspergillus terreus* | 9 |  |
| A0A8G1RUC4 | Cutinase | BO72DRAFT_428459 | *Aspergillus fijiensis* CBS 313.89 | 10 |  |
| A0A0L1INP6 | Cutinase | ANOM_010417 | *Aspergillus nomiae* NRRL 13137 | 9 |  |
| B8N7P9 | Cutinase | AFLA_104920 G4B84_004266 | *Aspergillus flavus* (strain ATCC 200026 / FGSC A1120 / IAM 13836 / NRRL 3357 / JCM 12722 / SRRC 167) | 8 |  |
| A0A2P2HB95 | Cutinase | AFLA70_50g003671 | *Aspergillus flavus (*strain ATCC MYA-384 / AF70) | 8 |  |
| A0A318ZBM0 | Cutinase | BP01DRAFT_343650 | *Aspergillus saccharolyticus* JOP 1030-1 | 8 |  |
| A0A1L9WKG0 | Cutinase | ASPACDRAFT_63532 | *Aspergillus aculeatus* (strain ATCC 16872 / CBS 172.66 / WB 5094) | 9 |  |
| A0A1E3BKU6 | Cutinase | SI65_04059 | *Aspergillus cristatus* (Chinese Fuzhuan brick tea-fermentation fungus) *(Eurotium cristatum)* | 11 |  |
| A0A7R7VRR7 | Cutinase | ACHE_50821S | *Aspergillus chevalieri (Eurotium chevalieri)* | 10 |  |
| A0A5N6TL99 | Cutinase | BDV25DRAFT_169396 | *Aspergillus avenaceus* | 9 |  |
| A0A319C9I2 | Cutinase | BO82DRAFT_382954 | *Aspergillus uvarum* CBS 121591 | 9 |  |
| A0A319F5Q5 | Cutinase | BO78DRAFT_434338 | *Aspergillus sclerotiicarbonarius* (strain CBS 121057 / IBT 28362) | 8 |  |
| A0A395GN85 | Cutinase | BO80DRAFT_416056 | *Aspergillus ibericus* CBS 121593 | 8 |  |
| A0A8T8X6B2 | Cutinase | BO86DRAFT_335953 | *Aspergillus japonicus* CBS 114.51 | 10 |  |
| A0A395I6L6 | Cutinase | BO97DRAFT_387915 | *Aspergillus homomorphus* (strain CBS 101889) | 8 |  |
| A0A318Z6C0 | Cutinase | BP01DRAFT_351558 | *Aspergillus saccharolyticus* JOP 1030-1 | 8 |  |
| A0A5N7BW16 | Cutinase | BDV23DRAFT_175776 | *Petromyces alliaceus (Aspergillus alliaceus)* | 9 |  |
| A0A317WZJ9 | Cutinase | BO94DRAFT_534415 | *Aspergillus sclerotioniger* CBS 115572 | 8 |  |
| Q2UIH1 | Cutinase | AO090023000058 | *Aspergillus oryzae (*strain ATCC 42149 / RIB 40) (Yellow koji mold) | 9 |  |
| A0A5N7ALU7 | Cutinase | BDV27DRAFT_140868 | *Aspergillus caelatus* | 9 |  |
| A0A1L9UYJ1 | Cutinase | ASPBRDRAFT_145740 | *Aspergillus brasiliensis* (strain CBS 101740 / IMI 381727 / IBT 21946) | 8 |  |
| A0A505ILZ7 | Cutinase | CAN33_009470 | *Aspergillus niger* | 8 |  |
| A0A8G1R4U5 | Cutinase | BO85DRAFT_416677 | *Aspergillus piperis* CBS 112811 | 8 |  |
| A0A5N6YNI7 | Cutinase | BDV24DRAFT_148516 | *Aspergillus arachidicola* | 9 |  |
| A0A5N6XMQ8 | Cutinase | BDV39DRAFT_188320 | *Aspergillus sergii* | 9 |  |
| A0A319BH53 | Cutinase | BO88DRAFT_363061 | *Aspergillus vadensis* (strain CBS 113365 / IMI 142717 / IBT 24658) | 8 |  |
| A0A318ZG12 | Cutinase | BP01DRAFT_346805 | *Aspergillus saccharolyticus* JOP 1030-1 | 8 |  |
| A0A1M3TXP5 | Cutinase | ASPFODRAFT_66149 | *Aspergillus luchuensis* (strain CBS 106.47) | 8 |  |
| A0A100I5Q6 | Cutinase | ABL_01103 | *Aspergillus niger* | 8 |  |
| A0A1L9N9N6 | Cutinase | ASPTUDRAFT_442563 | *Aspergillus tubingensis* (strain CBS 134.48) | 8 |  |
| A0A317UKG8 | Cutinase | BO83DRAFT_421932 | *Aspergillus eucalypticola* (strain CBS 122712 / IBT 29274) | 8 |  |
| A0A5N6F115 | Cutinase | BDV33DRAFT_228983 | *Aspergillus novoparasiticus* | 9 |  |
| A0A318YF06 | Cutinase | BO87DRAFT_362747 | *Aspergillus neoniger* (strain CBS 115656) | 8 |  |
| A0A8H3XZG7 | Cutinase | AtWU_06277 | *Aspergillus tubingensis* | 8 |  |
| A0A146G171 | Cutinase | AKAW2_21545A ALUC_21481A RIB2604_04200270 | *Aspergillus kawachii (*White koji mold) *(Aspergillus awamori var. kawachi)* | 8 |  |
| G7Y0V7 | Cutinase | AKAW_10929 | *Aspergillus kawachii (strain NBRC 4308) (White koji mold) (Aspergillus awamori var. kawachi)* | 8 |  |
| A0A2I2G3D5 | Cutinase | P170DRAFT_413282 | *Aspergillus steynii* IBT 23096 | 8 |  |
| A0A2V5HK64 | Cutinase | BO99DRAFT_452429 | *Aspergillus violaceofuscus* (strain CBS 115571) | 9 |  |
| A0A370PJP5 | Cutinase | M752DRAFT_301489 | *Aspergillus phoenicis* ATCC 13157 | 8 |  |
| A0A401KHR4 | Cutinase | AAWM_01789 | *Aspergillus awamori* (Black koji mold) | 8 |  |
| A0A319B5W0 | Cutinase | BO96DRAFT_472046 | *Aspergillus lacticoffeatus* (strain CBS 101883) | 8 |  |
| A0A370CEI8 | Cutinase | M747DRAFT_336820 | *Aspergillus niger* ATCC 13496 | 8 |  |
| A2QBP1 | Cutinase | An02g00730 | *Aspergillus niger* (strain ATCC MYA-4892 / CBS 513.88 / FGSC A1513) | 8 |  |
| A0A1R3RXX3 | Cutinase | ASPCADRAFT_160089 | *Aspergillus carbonarius* (strain ITEM 5010) | 8 |  |
| A0A0R6I0L5 | Cutinase | ATCC64974_59570 | *Aspergillus niger* | 8 |  |
| A0A3F3PYY9 | Cutinase | BDQ94DRAFT_171395 | *Aspergillus welwitschiae* | 8 |  |
| A0A4S3JLE8 | Cutinase | ATNIH1004_008129 EYZ11_006410 | *Aspergillus tanneri* | 7 |  |
| A0A0U5GG86 | Cutinase | ASPCAL13480 | *Aspergillus calidoustus* | 7 |  |
| G3Y192 | Cutinase | ASPNIDRAFT_36638 | *Aspergillus niger* (strain ATCC 1015 / CBS 113.46 / FGSC A1144 / LSHB Ac4 / NCTC 3858a / NRRL 328 / USDA 3528.7) | 9 |  |
| A0A0F8V3J9 | cutinase | ARAM_001573 | *Aspergillus rambellii* | 7 |  |
| A0A0F8VN30 | cutinase | AOCH_001615 | *Aspergillus ochraceoroseus* | 7 |  |
| A0A5N6ZFL7 | cutinase | BDV28DRAFT_127276 | *Aspergillus coremiiformis* | 9 |  |
| A0A1L9VMV4 | Cutinase | ASPGLDRAFT_148132 | *Aspergillus glaucus* CBS 516.65 | 6 |  |
| A0A317VQY2 | Cutinase | BO70DRAFT_364294 | *Aspergillus heteromorphus* CBS 117.55 | 8 |  |
| A0A2T5LVW1 | cutinase | P175DRAFT_0481787 | *Aspergillus ochraceoroseus* IBT 24754 | 7 |  |
| A0A319D0D1 | Cutinase | BO71DRAFT_387060 | *Aspergillus ellipticus* CBS 707.79 | 7 |  |
| A0A1L9PYQ2 | Cutinase | ASPVEDRAFT_140732 | *Aspergillus versicolor* CBS 583.65 | 8 |  |
| A0A7R8AV91 | Cutinase | APUU_80956A | *Aspergillus puulaauensis* | 8 |  |
| Q5B9E7 | Cutinase | AN2833.2 | *Emericella nidulans* (strain FGSC A4 / ATCC 38163 / CBS 112.46 / NRRL 194 / M139) *(Aspergillus nidulans)* | 7 |  |
| A0A3D8Q9R2 | Cutinase | DSM5745_11257 | *Aspergillus mulundensis* | 6 |  |
| A0A317UWH6 | Cutinase | BO83DRAFT_320961 | *Aspergillus eucalypticola* (strain CBS 122712 / IBT 29274) | 6 |  |
| A0A0U5GH79 | cutinase | ASPCAL14489 | *Aspergillus calidoustus* | 2 |  |
| A0A5N6U914 | Cutinase | BDV25DRAFT_146566 | *Aspergillus avenaceus* | 19 |  |
| A0A5N5WTX2 | Cutinase | BDV29DRAFT_197569 | *Aspergillus leporis* | 23 |  |
| A0A5N6SDI5 | Cutinase | BDV38DRAFT_199823 | *Aspergillus pseudotamarii* | 14 |  |
| A0A5N7A336 | Cutinase | BDV27DRAFT_118143 | *Aspergillus caelatus* | 14 |  |
| A0A5N6UF70 | Cutinase | BDV40DRAFT_59575 | *Aspergillus tamarii* | 14 |  |
| A0A5N6Z6B7 | Cutinase | BDV28DRAFT_157229 | *Aspergillus coremiiformis* | 10 |  |
| A0A8H6A5Y5 | Cutinase | ETB97_000514 | *Aspergillus burnettii* | 15 |  |
| A0A5N7C5F6 | Cutinase | BDV23DRAFT_184574 | *Petromyces alliaceus (Aspergillus alliaceus)* | 13 |  |
| A0A1F8A0U7 | Cutinase | ABOM_005574 | *Aspergillus bombycis* | 14 |  |
| A0A2G7FU55 | Cutinase | AARAC_011301 BDV24DRAFT_139032 | *Aspergillus arachidicola* | 15 |  |
| A0A7U2MHH0 | Cutinase | F9C07_1715 | *Aspergillus flavus* | 15 |  |
| B8N2Q5 | Cutinase | AFLA_023390 G4B84_004106 | *Aspergillus flavus* (strain ATCC 200026 / FGSC A1120 / IAM 13836 / NRRL 3357 / JCM 12722 / SRRC 167) | 15 |  |
| A0A2P2H6J5 | Cutinase | AFLA70_20g004971 | *Aspergillus flavus (*strain ATCC MYA-384 / AF70) | 15 |  |
| A0A364MJI3 | Cutinase | CA14_011528 | *Aspergillus flavus* | 15 |  |
| I8IRG2 | Cutinase | Ao3042_01510 | *Aspergillus oryzae* (strain 3.042) (Yellow koji mold) | 15 |  |
| Q2UIR7 | Cutinase | AO090003001507 | *Aspergillus oryzae (*strain ATCC 42149 / RIB 40) (Yellow koji mold) | 15 |  |
| Q9P960 | Cutinase | tglA | *Aspergillus oryzae (*Yellow koji mold) | 15 |  |
| A0A5N6JMU7 | Cutinase | BDV30DRAFT_232954 | *Aspergillus minisclerotigenes* | 16 |  |
| A0A5N6GWW0 | Cutinase | BDV35DRAFT_380697 | *Aspergillus flavus* | 14 |  |
| A0A5N6X7H2 | Cutinase | BDV39DRAFT_78727 | *Aspergillus sergii* | 16 |  |
| A0A0F0IG15 | Cutinase | P875_00010039 | *Aspergillus parasiticus* (strain ATCC 56775 / NRRL 5862 / SRRC 143 / SU-1) | 16 |  |
| A0A5N6E2P0 | Cutinase | BDV34DRAFT_85893 | *Aspergillus parasiticus* | 16 |  |
| A0A5N6ERG8 | Cutinase | BDV33DRAFT_100406 | *Aspergillus novoparasiticus* | 16 |  |
| A0A5N6VPA4 | Cutinase | BDV41DRAFT_397207 | *Aspergillus transmontanensis* | 16 |  |
| A0A0M4APK0 | Cutinase |  | *Aspergillus oryzae (*Yellow koji mold) | 13 |  |
| A0A1S9DKL5 | Cutinase | OAory_01053960 | *Aspergillus oryzae (*Yellow koji mold) | 13 |  |
| A0A5N7BL11 | Cutinase | BDV26DRAFT_4929 | *Aspergillus bertholletiae* | 14 |  |
| A0A5N6FME4 | Cutinase | BDW43DRAFT_166531 | *Petromyces alliaceus (Aspergillus alliaceus)* | 14 |  |
| A0A5N6IDF8 | Cutinase | BDV32DRAFT_75274 | *Aspergillus pseudonomiae* | 11 |  |
| A0A0L1IZG4 | cutinase | ANOM_008687 | *Aspergillus nomiae* NRRL 13137 | 11 |  |
| A0A5N7D5D0 | Cutinase | BDV37DRAFT_193984 | *Aspergillus pseudonomiae* | 8 |  |
| A0A5N7ECP0 | Cutinase | BDV36DRAFT_206121 | *Aspergillus pseudocaelatus* | 6 |  |
| A0A5N6U4L1 | Cutinase | BDV25DRAFT_21475 | *Aspergillus avenaceus* | 43 |  |
| A0A317VTY8 | Cutinase | BO83DRAFT_406862 | *Aspergillus eucalypticola* (strain CBS 122712 / IBT 29274) | 45 |  |
| A0A1R3RAC0 | Cutinase | ASPCADRAFT_177434 | *Aspergillus carbonarius* (strain ITEM 5010) | 44 |  |
| A0A146FG51 | Cutinase | AKAW2_40906A ALUC_40870A RIB2604_01901460 | *Aspergillus kawachii (*White koji mold) *(Aspergillus awamori var. kawachi)* | 45 |  |
| A0A1M3TC72 | Cutinase | ASPFODRAFT_208879 | *Aspergillus luchuensis* (strain CBS 106.47) | 45 |  |
| G7XJ51 | Cutinase | AKAW_05190 | *Aspergillus kawachii (strain NBRC 4308) (White koji mold) (Aspergillus awamori var. kawachi)* | 45 |  |
| A0A8G1VH60 | Cutinase | BO85DRAFT_523893 | *Aspergillus piperis* CBS 112811 | 45 |  |
| A0A319F771 | Cutinase | BO78DRAFT_381968 | *Aspergillus sclerotiicarbonarius* (strain CBS 121057 / IBT 28362) | 41 |  |
| A0A318ZPX4 | Cutinase | BP01DRAFT_294760 | *Aspergillus saccharolyticus* JOP 1030-1 | 40 |  |
| A0A2V5IJM1 | Cutinase | BO99DRAFT_470243 | *Aspergillus violaceofuscus* (strain CBS 115571) | 41 |  |
| A0A8T8XCM2 | Cutinase | BO86DRAFT_354742 | *Aspergillus japonicus* CBS 114.51 | 41 |  |
| A0A2V5IJH2 | Cutinase | BP00DRAFT_484704 | *Aspergillus indologenus* CBS 114.80 | 42 |  |
| A0A319CJ91 | Cutinase | BO82DRAFT_351976 | *Aspergillus uvarum* CBS 121591 | 41 |  |
| A0A8G1RIE5 | Cutinase | BO72DRAFT_393109 | *Aspergillus fijiensis* CBS 313.89 | 42 |  |
| A0A1L9WNQ9 | Cutinase | ASPACDRAFT_62073 | *Aspergillus aculeatus* (strain ATCC 16872 / CBS 172.66 / WB 5094) | 41 |  |
| A0A319CBV2 | Cutinase | BO88DRAFT_358699 | *Aspergillus vadensis* (strain CBS 113365 / IMI 142717 / IBT 24658) | 45 |  |
| A0A100IKI7 | Cutinase | ABL_05589 | *Aspergillus niger* | 45 |  |
| A0A8H3XT88 | Cutinase | AtWU_00779 | *Aspergillus tubingensis* | 45 |  |
| A0A1L9NKL0 | Cutinase | ASPTUDRAFT_60389 | *Aspergillus tubingensis* (strain CBS 134.48) | 45 |  |
| A0A317X6E5 | Cutinase | BO94DRAFT_543182 | *Aspergillus sclerotioniger* CBS 115572 | 43 |  |
| A0A1L9UZ67 | Cutinase | ASPBRDRAFT_140404 | *Aspergillus brasiliensis* (strain CBS 101740 / IMI 381727 / IBT 21946) | 43 |  |
| A0A318Z3P7 | Cutinase | BO87DRAFT_357875 | *Aspergillus neoniger* (strain CBS 115656) | 44 |  |
| A0A395GHT6 | Cutinase | BO80DRAFT_370103 | *Aspergillus ibericus* CBS 121593 | 44 |  |
| A0A254U262 | Cutinase | ATCC64974_1950 CAN33_0026590 | *Aspergillus niger* | 44 |  |
| A0A370CGU9 | Cutinase | M747DRAFT_336561 | *Aspergillus niger* ATCC 13496 | 44 |  |
| A0A3F3QHS9 | Cutinase | BDQ94DRAFT_166406 | *Aspergillus welwitschiae* | 44 |  |
| A0A401KJK9 | Cutinase | AAWM_02260 | *Aspergillus awamori* (Black koji mold) | 44 |  |
| A0A317VM41 | Cutinase | BO70DRAFT_364009 | *Aspergillus heteromorphus* CBS 117.55 | 42 |  |
| A0A370PET3 | Cutinase | M752DRAFT_303419 | *Aspergillus phoenicis* ATCC 13157 | 44 |  |
| A0A395I9B4 | Cutinase | BO97DRAFT_456352 | *Aspergillus homomorphus* (strain CBS 101889) | 41 |  |
| A0A5N6TBW3 | Cutinase | BDV38DRAFT_289560 | *Aspergillus pseudotamarii* | 41 |  |
| A0A5N7DJC6 | Cutinase | BDV32DRAFT_138656 BDV37DRAFT_292100 | *Aspergillus pseudonomiae* | 43 |  |
| A0A2I2FW73 | Cutinase | P170DRAFT_365925 | *Aspergillus steynii* IBT 23096 | 43 |  |
| A0A319CVW3 | Cutinase | BO71DRAFT_364808 | *Aspergillus ellipticus* CBS 707.79 | 42 |  |
| A0A5N6G407 | Cutinase | BDW43DRAFT_307378 | *Petromyces alliaceus (Aspergillus alliaceus)* | 43 |  |
| A0A5N6ZXV4 | Cutinase | BDV27DRAFT_166699 | *Aspergillus caelatus* | 43 |  |
| A0A5N7EXS4 | Cutinase | BDV36DRAFT_290144 | *Aspergillus pseudocaelatus* | 43 |  |
| A0A2G7FR50 | Cutinase | AARAC_004897 BDV24DRAFT_162691 | *Aspergillus arachidicola* | 43 |  |
| A0A5N7C698 | Cutinase | BDV23DRAFT_184241 | *Petromyces alliaceus (Aspergillus alliaceus)* | 43 |  |
| A0A8H5ZZW0 | Cutinase | ETB97_004862 | *Aspergillus burnettii* | 43 |  |
| A0A5N6F7V2 | Cutinase | BDV33DRAFT_187048 | *Aspergillus novoparasiticus* | 44 |  |
| A0A5M3YYE0 | Cutinase | ATEIFO6365_0002023200 ATETN484_0004023200 | *Aspergillus terreus* | 39 |  |
| A0A0L1JDR3 | Cutinase | ANOM_001770 | *Aspergillus nomiae* NRRL 13137 | 44 |  |
| A0A1F8A0Q8 | Cutinase | ABOM_005753 | *Aspergillus bombycis* | 43 |  |
| A0A2P2GXH1 | Cutinase | AFLA70_220g001800 | *Aspergillus flavus (*strain ATCC MYA-384 / AF70) | 43 |  |
| A0A7G5JGY8 | Cutinase | G4B84_010371 | *Aspergillus flavus* (strain ATCC 200026 / FGSC A1120 / IAM 13836 / NRRL 3357 / JCM 12722 / SRRC 167) | 43 |  |
| A0A7U2MWK0 | Cutinase | F9C07_2280507 | *Aspergillus flavus* | 43 |  |
| A0A5N6IS50 | Cutinase | BDV30DRAFT_229802 | *Aspergillus minisclerotigenes* | 44 |  |
| A0A1L9RF54 | cutinase | ASPWEDRAFT_115688 | *Aspergillus wentii* DTO 134E9 | 35 |  |
| A0A5N6Z7D8 | Cutinase | BDV28DRAFT_165174 | *Aspergillus coremiiformis* | 37 |  |
| A0A5N6HE63 | Cutinase | BDV35DRAFT_403450 | *Aspergillus flavus* | 43 |  |
| I7GSC4 | Cutinase | Cut C OAory_01088120 | *Aspergillus oryzae (*Yellow koji mold) | 43 |  |
| A0A364LUY0 | Cutinase | CA14_008543 | *Aspergillus flavus* | 43 |  |
| A0A5N6X298 | Cutinase | BDV39DRAFT_192994 | *Aspergillus sergii* | 44 |  |
| A0A0F0HZM0 | Cutinase | P875_00042868 | *Aspergillus parasiticus* (strain ATCC 56775 / NRRL 5862 / SRRC 143 / SU-1) | 44 |  |
| A0A5N6DXQ1 | Cutinase | BDV34DRAFT_210310 | *Aspergillus parasiticus* | 44 |  |
| A0A5N6VY16 | Cutinase | BDV41DRAFT_564384 | *Aspergillus transmontanensis* | 44 |  |
| A0A5N6US21 | Cutinase | BDV40DRAFT_313229 | *Aspergillus tamarii* | 43 |  |
| A0A0J5PYW8 | Cutinase | Y699_02882 | *Aspergillus fumigatus* Z5 | 37 |  |
| A0A229WAI9 | Cutinase | CDV57_07434 CNMCM8057_007454 CNMCM8686_007495 | *Aspergillus fumigatus (Neosartorya fumigata)* | 37 |  |
| A0A8H4MGN0 | Cutinase | CNMCM6457_007885 CNMCM6805_005550 | *Aspergillus fumigatiaffinis* | 37 |  |
| A0A8H4G4T4 | Cutinase | CNMCM8694_000453 CNMCM8927_003290 IFM58399_03875 | *Aspergillus lentulus* | 37 |  |
| A0A0S7DWL7 | Cutinase | ALT_000886 ALT_4097 | *Aspergillus lentulus* | 37 |  |
| A0A0F8USW6 | Cutinase | ARAM_007031 | *Aspergillus rambellii* | 36 |  |
| A0A397HJ09 | Cutinase | CDV56_108615 | *Aspergillus thermomutatus* | 38 |  |
| A0A0F8UBJ4 | Cutinase | AOCH_006260 | *Aspergillus ochraceoroseus* | 38 |  |
| A0A2T5LX55 | Cutinase | P175DRAFT_0523726 | *Aspergillus ochraceoroseus* IBT 24754 | 38 |  |
| A0A2I1CMD1 | Cutinase | P174DRAFT_27804 | *Aspergillus novofumigatus* (strain IBT 16806) | 38 |  |
| A0A1L9RN22 | Cutinase | ASPWEDRAFT_77488 | *Aspergillus wentii* DTO 134E9 | 34 |  |
| A0A8H3NIG4 | Cutinase | Aud_000922 IFM51744_01835 | *Aspergillus udagawae* | 37 |  |
| A0A0U5GBN7 | Cutinase | ASPCAL12155 | *Aspergillus calidoustus* | 40 |  |
| A0A1L9PZ26 | cutinase | ASPVEDRAFT_46049 | *Aspergillus versicolor* CBS 583.65 | 34 |  |
| A0A2I2GRY2 | Cutinase | P170DRAFT_443381 | *Aspergillus steynii* IBT 23096 | 34 |  |
| A0A3M2SUH5 | Cutinase | PHISP_07924 | *Aspergillus* sp. HF37 | 38 |  |
| A0A8H3NDT7 | Cutinase | Aud_002246 IFM46972_02101 IFM51744_06299 | *Aspergillus udagawae* | 38 |  |
| A0A8H6PVM7 | Cutinase | CNMCM5623_006706 CNMCM7691_002210 | *Aspergillus felis* | 35 |  |
| A0A0F8UVC6 | Cutinase | AOCH_004266 | *Aspergillus ochraceoroseus* | 37 |  |
| A0A0F8V5J0 | Cutinase | ARAM_002972 | *Aspergillus rambellii* | 37 |  |
| A0A2T5LVQ0 | Cutinase | P175DRAFT_0438940 | *Aspergillus ochraceoroseus* IBT 24754 | 37 |  |
| A0A397H439 | Cutinase | CDV56_103087 | *Aspergillus thermomutatus* | 38 |  |
| A0A0S7DYM9 | Cutinase | ALT_007856 ALT_4928 CNMCM8694_005293 CNMCM8927_008669 IFM58399_04546 | *Aspergillus lentulus* | 38 |  |
| A0A8H4GRE9 | Cutinase | CNMCM6805_003741 | *Aspergillus fumigatiaffinis* | 38 |  |
| A0A8H4GGS7 | Cutinase | CNMCM6457_003619 | *Aspergillus fumigatiaffinis* | 38 |  |
| A0A421CX34 | Cutinase | CFD26_102565 | *Aspergillus turcosus* | 37 |  |
| A0A0J5SLH0 | Cutinase | Y699_03577 | *Aspergillus fumigatus* Z5 | 36 |  |
| A0A229W7U0 | Cutinase | CDV57_08120 CNMCM8057_003942 CNMCM8686_000009 | *Aspergillus fumigatus (Neosartorya fumigata)* | 36 |  |
| A0A2I1C750 | Cutinase | P174DRAFT_409639 | *Aspergillus novofumigatus* (strain IBT 16806) | 38 |  |
| A0A397GD84 | Cutinase | CDV55_100527 | *Aspergillus turcosus* | 37 |  |
| A0A5M3YU02 | Cutinase | ATEIFO6365_0004078500 ATETN484_0002081000 | *Aspergillus terreus* | 36 |  |
| G3XP44 | cutinase | ASPNIDRAFT_41640 | *Aspergillus niger* (strain ATCC 1015 / CBS 113.46 / FGSC A1144 / LSHB Ac4 / NCTC 3858a / NRRL 328 / USDA 3528.7) | 37 |  |
| A0A319AE76 | cutinase | BO96DRAFT_468293 | *Aspergillus lacticoffeatus* (strain CBS 101883) | 37 |  |
| A0A0U5C405 | Cutinase | ASPCAL03405 | *Aspergillus calidoustus* | 37 |  |
| A0A5N5WS52 | Cutinase | BDV29DRAFT_197958 | *Aspergillus leporis* | 42 |  |
| A0A5N7BJN2 | Cutinase | BDV26DRAFT_278383 | *Aspergillus bertholletiae* | 37 |  |
| A0A0F8UNJ0 | Cutinase | ARAM_004707 | *Aspergillus rambellii* | 32 |  |
| A0A0F8WMR6 | Cutinase | AOCH_004426 | *Aspergillus ochraceoroseus* | 32 |  |
| A0A2T5M5W1 | Cutinase | P175DRAFT_0448818 | *Aspergillus ochraceoroseus* IBT 24754 | 32 |  |
| A0A5M3Z1V7 | Cutinase | ATEIFO6365_0011002300 ATETN484_0006002300 | *Aspergillus terreus* | 36 |  |
| A0A1L9T868 | cutinase | ASPSYDRAFT_48823 | *Aspergillus sydowii* CBS 593.65 | 32 |  |
| A0A1L9R4D6 | Cutinase | ASPWEDRAFT_121786 | *Aspergillus wentii* DTO 134E9 | 36 |  |
| A0A1L9RPZ1 | Cutinase | ASPWEDRAFT_181950 | *Aspergillus wentii* DTO 134E9 | 31 |  |
| A0A7R7XZE2 | cutinase | APUU_80814A | *Aspergillus puulaauensis* | 34 |  |
| A0A0U5GQH5 | Cutinase | ASPCAL07697 | *Aspergillus calidoustus* | 38 |  |
| A0A2I2FIG9 | Cutinase | BDW47DRAFT_134808 | *Aspergillus candidus* | 34 |  |
| A0A2J5HR16 | Cutinase | BDW42DRAFT_201594 | *Aspergillus taichungensis* | 34 |  |
| A0A2I1D761 | Cutinase | P168DRAFT_303454 | *Aspergillus campestris* IBT 28561 | 34 |  |
| A0A8H6PWL3 | Cutinase | CNMCM5793_006395 CNMCM6106_008717 | *Aspergillus hiratsukae* | 35 |  |
| A0A1E3B192 | Cutinase | SI65_09909 | *Aspergillus cristatus* (Chinese Fuzhuan brick tea-fermentation fungus) *(Eurotium cristatum)* | 39 |  |
| A0A7R7VUS8 | Cutinase | ACHE_70024A | *Aspergillus chevalieri (Eurotium chevalieri)* | 39 |  |
| A0A0U5GGI8 | Cutinase | ASPCAL14703 | *Aspergillus calidoustus* | 38 |  |
| A0A8H6Q4X5 | Cutinase | CNMCM5623_010005 CNMCM7691_002857 | *Aspergillus felis* | 33 |  |
| A0A1L9V7P6 | Cutinase | ASPGLDRAFT_1504135 | *Aspergillus glaucus* CBS 516.65 | 39 |  |
| A0A2I1C404 | Cutinase | P174DRAFT_451713 | *Aspergillus novofumigatus* (strain IBT 16806) | 34 |  |
| A0A017SR61 | Cutinase | EURHEDRAFT_471081 | *Aspergillus ruber* (strain CBS 135680) | 38 |  |
| A0A8H3S7L4 | Cutinase | IFM51744_07900 | *Aspergillus udagawae* | 34 |  |
| A0A8H3SG74 | Cutinase | IFM46972_11403 | *Aspergillus udagawae* | 33 |  |
| A0A8E0UYH2 | Cutinase | Aud_006926 | *Aspergillus udagawae* | 34 |  |
| A0A0J5PIG4 | Cutinase | Y699_09222 | *Aspergillus fumigatus* Z5 | 35 |  |
| A0A229XTK6 | Cutinase | CDV57_06785 | *Aspergillus fumigatus (Neosartorya fumigata)* | 35 |  |
| A0A229Z420 | Cutinase | CDV55_107184 CFD26_107225 | *Aspergillus turcosus* | 36 |  |
| A0A8H3NCX8 | Cutinase | IFM46972_02532 | *Aspergillus udagawae* | 33 |  |
| A0A8H4HSR3 | Cutinase | CNMCM8057_008080 | *Aspergillus fumigatus (Neosartorya fumigata)* | 34 |  |
| A0A8H4MV42 | Cutinase | CNMCM8686_008620 | *Aspergillus fumigatus (Neosartorya fumigata)* | 34 |  |
| A0A8H4DB98 | Cutinase | CNMCM8694_002004 CNMCM8927_004115 | *Aspergillus lentulus* | 34 |  |
| A0A0S7DU46 | Cutinase | ALT_008856 ALT_5832 IFM58399_05715 | *Aspergillus lentulus* | 34 |  |
| A0A1L9RZ92 | Cutinase | ASPWEDRAFT_144666 | *Aspergillus wentii* DTO 134E9 | 34 |  |
| A0A0U5G4R5 | Cutinase | ASPCAL05624 | *Aspergillus calidoustus* | 39 |  |
| A0A5M3ZEU8 | Cutinase | ATEIFO6365_0012040500 ATETN484_0013041600 | *Aspergillus terreus* | 34 |  |
| A0A2V5J3U4 | Cutinase | BP00DRAFT_421233 | *Aspergillus indologenus* CBS 114.80 | 20 |  |
| A0A397GH94 | Cutinase | CDV56_106452 | *Aspergillus thermomutatus* | 33 |  |
| A0A8T8X123 | Cutinase | BO86DRAFT_363433 | *Aspergillus japonicus* CBS 114.51 | 24 |  |
| A0A8H4MFB4 | Cutinase | CNMCM6457_006370 CNMCM6805_002367 | *Aspergillus fumigatiaffinis* | 31 |  |
| A0A1L9PSA9 | Cutinase | ASPVEDRAFT_135708 | *Aspergillus versicolor* CBS 583.65 | 34 |  |
| A0A395HZB8 | Cutinase | BO97DRAFT_424061 | *Aspergillus homomorphus* (strain CBS 101889) | 21 |  |
| A0A3D8QAR6 | Cutinase | DSM5745_11148 | *Aspergillus mulundensis* | 37 |  |
| A0A8H6QN03 | Cutinase | CNMCM7691_003472 | *Aspergillus felis* | 35 |  |
| A0A5N6G083 | Cutinase | BDW43DRAFT_299853 | *Petromyces alliaceus (Aspergillus alliaceus)* | 35 |  |
| A0A5N7CLU8 | Cutinase | BDV23DRAFT_179607 | *Petromyces alliaceus (Aspergillus alliaceus)* | 34 |  |
| A0A8H5ZU22 | Cutinase | ETB97_008594 | *Aspergillus burnettii* | 34 |  |
| A0A8H6PWP0 | Cutinase | CNMCM5623_007841 | *Aspergillus felis* | 33 |  |
| A0A7R8AUQ3 | Cutinase | APUU_80418A | *Aspergillus puulaauensis* | 33 |  |
| A0A1L9WYN5 | Cutinase | ASPACDRAFT_77135 | *Aspergillus aculeatus* (strain ATCC 16872 / CBS 172.66 / WB 5094) | 20 |  |
| I8TVI3 | Cutinase | Ao3042_05584 | *Aspergillus oryzae* (strain 3.042) (Yellow koji mold) | 32 |  |
| A0A319CRT5 | cutinase | BO82DRAFT_302097 | *Aspergillus uvarum* CBS 121591 | 20 |  |
| A0A7R7X9D8 | cutinase | APUU_10100A | *Aspergillus puulaauensis* | 28 |  |
| A0A5M3Z9Q0 | Cutinase | ATEIFO6365_0009043300 ATETN484_0011042800 | *Aspergillus terreus* | 31 |  |
| A0A3M7KGZ2 | Cutinase | CA14_008605 F9C07_5814 | *Aspergillus flavus* | 32 |  |
| A0A1S9DDD9 | Cutinase | OAory_01092880 | *Aspergillus oryzae (*Yellow koji mold) | 32 |  |
| A0A5N6GU43 | Cutinase | BDV35DRAFT_381430 | *Aspergillus flavus* | 32 |  |
| A0A7G5JIB6 | Cutinase | G4B84_010849 | *Aspergillus flavus* (strain ATCC 200026 / FGSC A1120 / IAM 13836 / NRRL 3357 / JCM 12722 / SRRC 167) | 32 |  |
| A0A2I2GDH8 | Cutinase | P170DRAFT_493134 | *Aspergillus steynii* IBT 23096 | 35 |  |
| A0A2P2H7M9 | Cutinase | AFLA70_17g005581 | *Aspergillus flavus (*strain ATCC MYA-384 / AF70) | 32 |  |
| A0A319DH01 | cutinase | BO71DRAFT_168140 | *Aspergillus ellipticus* CBS 707.79 | 32 |  |
| A0A5N6HSU4 | Cutinase | BDV32DRAFT_161169 BDV37DRAFT_286798 | *Aspergillus pseudonomiae* | 33 |  |
| A0A5N6IVJ9 | Cutinase | BDV30DRAFT_161452 | *Aspergillus minisclerotigenes* | 33 |  |
| A0A3D8RKW1 | Cutinase | DSM5745_07260 | *Aspergillus mulundensis* | 33 |  |
| A0A1L9TEZ3 | Cutinase | ASPSYDRAFT_90176 | *Aspergillus sydowii* CBS 593.65 | 33 |  |
| A0A2I2GLW0 | Cutinase | P170DRAFT_396811 | *Aspergillus steynii* IBT 23096 | 30 |  |
| A0A5N7BSL4 | Cutinase | BDV23DRAFT_176761 | *Petromyces alliaceus (Aspergillus alliaceus)* | 35 |  |
| A0A8H6E4L3 | Cutinase | ETB97_004682 | *Aspergillus burnettii* | 35 |  |
| A0A5N6XC86 | Cutinase | BDV39DRAFT_191631 | *Aspergillus sergii* | 32 |  |
| A0A5N6FWJ5 | Cutinase | BDW43DRAFT_311365 | *Petromyces alliaceus (Aspergillus alliaceus)* | 34 |  |
| A0A5N6TT50 | Cutinase | BDV25DRAFT_167948 | *Aspergillus avenaceus* | 30 |  |
| A0A1L9PUL6 | Cutinase | ASPVEDRAFT_44769 | *Aspergillus versicolor* CBS 583.65 | 28 |  |
| A0A319A0T6 | cutinase | BO96DRAFT_401534 | *Aspergillus lacticoffeatus* (strain CBS 101883) | 31 |  |
| A0A370BP75 | cutinase | M747DRAFT_334854 | *Aspergillus niger* ATCC 13496 | 31 |  |
| A0A370P6W8 | cutinase | M752DRAFT_309027 | *Aspergillus phoenicis* ATCC 13157 | 31 |  |
| A0A0F0I5Q9 | Cutinase | P875_00042442 | *Aspergillus parasiticus* (strain ATCC 56775 / NRRL 5862 / SRRC 143 / SU-1) | 33 |  |
| A0A2G7EMS2 | Cutinase | AARAC_006644 BDV24DRAFT_153606 | *Aspergillus arachidicola* | 33 |  |
| A0A5N6DBD4 | Cutinase | BDV34DRAFT_228422 | *Aspergillus parasiticus* | 33 |  |
| A0A5N6EY06 | Cutinase | BDV33DRAFT_189903 | *Aspergillus novoparasiticus* | 33 |  |
| A0A5N5WND0 | Cutinase | BDV29DRAFT_63803 | *Aspergillus leporis* | 33 |  |
| A0A1F7ZNN2 | Cutinase | ABOM_010224 | *Aspergillus bombycis* | 32 |  |
| A0A5N6W7N0 | Cutinase | BDV41DRAFT_573371 | *Aspergillus transmontanensis* | 33 |  |
| A0A5N6UIF6 | Cutinase | BDV40DRAFT_22848 | *Aspergillus tamarii* | 33 |  |
| A0A254UE39 | cutinase | ATCC64974_87060 CAN33_0028750 | *Aspergillus niger* | 31 |  |
| G3YBD6 | cutinase | ASPNIDRAFT_178346 | *Aspergillus niger* (strain ATCC 1015 / CBS 113.46 / FGSC A1144 / LSHB Ac4 / NCTC 3858a / NRRL 328 / USDA 3528.7) | 31 |  |
| A0A0F6TMI2 | cutinase |  | *Aspergillus niger* | 31 |  |
| A0A3F3QCH7 | cutinase | BDQ94DRAFT_184864 | *Aspergillus welwitschiae* | 31 |  |
| A0A401KLM2 | cutinase | AAWM_03026 | *Aspergillus awamori* (Black koji mold) | 31 |  |
| A0A1L9T4G9 | Cutinase | ASPSYDRAFT_497571 | *Aspergillus sydowii* CBS 593.65 | 28 |  |
| A0A5N6SNJ4 | Cutinase | BDV38DRAFT_294944 | *Aspergillus pseudotamarii* | 33 |  |
| A0A0L1JBR6 | Cutinase | ANOM_002174 | *Aspergillus nomiae* NRRL 13137 | 33 |  |
| A0A5N7DK51 | Cutinase | BDV32DRAFT_159450 BDV37DRAFT_291811 | *Aspergillus pseudonomiae* | 33 |  |
| A0A5N7E6E9 | Cutinase | BDV36DRAFT_303513 | *Aspergillus pseudocaelatus* | 33 |  |
| A0A5N7A7I6 | Cutinase | BDV27DRAFT_106441 | *Aspergillus caelatus* | 33 |  |
| A0A317UNB9 | cutinase | BO83DRAFT_350279 | *Aspergillus eucalypticola* (strain CBS 122712 / IBT 29274) | 32 |  |
| A0A5N5XA21 | Cutinase | BDV29DRAFT_189709 | *Aspergillus leporis* | 33 |  |
| A0A0L1J803 | Cutinase | ANOM_004397 | *Aspergillus nomiae* NRRL 13137 | 32 |  |
| A0A1L9U368 | cutinase | ASPBRDRAFT_201334 | *Aspergillus brasiliensis* (strain CBS 101740 / IMI 381727 / IBT 21946) | 29 |  |
| A0A319B002 | cutinase | BO88DRAFT_395002 | *Aspergillus vadensis* (strain CBS 113365 / IMI 142717 / IBT 24658) | 30 |  |
| A0A8G1RKL3 | cutinase | BO72DRAFT_386881 | *Aspergillus fijiensis* CBS 313.89 | 14 |  |
| A0A2I1DBE8 | Cutinase | P168DRAFT_324625 | *Aspergillus campestris* IBT 28561 | 24 |  |
| A0A1L9N071 | cutinase | ASPTUDRAFT_30574 | *Aspergillus tubingensis* (strain CBS 134.48) | 30 |  |
| A0A8H3XZK1 | cutinase | AtWU_06368 | *Aspergillus tubingensis* | 30 |  |
| A0A146F7K1 | cutinase | ALUC_80022A RIB2604_01500270 | *Aspergillus kawachii (*White koji mold) *(Aspergillus awamori var. kawachi)* | 31 |  |
| G7X9W2 | cutinase | AKAW_02279 | *Aspergillus kawachii (strain NBRC 4308) (White koji mold) (Aspergillus awamori var. kawachi)* | 31 |  |
| A0A8G1R1U9 | cutinase | BO85DRAFT_514511 | *Aspergillus piperis* CBS 112811 | 31 |  |
| A0A318Z1U1 | cutinase | BO87DRAFT_406722 | *Aspergillus neoniger* (strain CBS 115656) | 30 |  |
| A0A5N7B504 | Cutinase | BDV26DRAFT_293952 | *Aspergillus bertholletiae* | 34 |  |
| A0A3M2T2T7 | Cutinase | PHISP_05212 | *Aspergillus* sp. HF37 | 27 |  |
| A0A100IIR3 | cutinase | ABL_04628 | *Aspergillus niger* | 29 |  |
| A0A5N6XIV9 | Cutinase | BDV39DRAFT_156890 | *Aspergillus sergii* | 34 |  |
| A0A317V5S1 | cutinase | BO70DRAFT_374354 | *Aspergillus heteromorphus* CBS 117.55 | 30 |  |
| A0A5N6YSB2 | Cutinase | BDV24DRAFT_122259 | *Aspergillus arachidicola* | 35 |  |
| A0A1M3T2V8 | cutinase | ASPFODRAFT_200095 | *Aspergillus luchuensis* (strain CBS 106.47) | 31 |  |
| A0A319DXE1 | cutinase | BO78DRAFT_432820 | *Aspergillus sclerotiicarbonarius* (strain CBS 121057 / IBT 28362) | 31 |  |
| A0A2V5IKA0 | cutinase | BP00DRAFT_248697 | *Aspergillus indologenus* CBS 114.80 | 33 |  |
| A0A1F7ZZL4 | Cutinase | ABOM_006753 | *Aspergillus bombycis* | 35 |  |
| A0A5N6SIP8 | Cutinase | BDV38DRAFT_296010 | *Aspergillus pseudotamarii* | 34 |  |
| A0A318YZR5 | cutinase | BP01DRAFT_308163 | *Aspergillus saccharolyticus* JOP 1030-1 | 33 |  |
| A0A2V5HDA3 | cutinase | BO99DRAFT_471494 | *Aspergillus violaceofuscus* (strain CBS 115571) | 33 |  |
| A0A8T8XBB5 | cutinase | BO86DRAFT_406705 | *Aspergillus japonicus* CBS 114.51 | 33 |  |
| A0A5N6IYP7 | Cutinase | BDV30DRAFT_240856 | *Aspergillus minisclerotigenes* | 34 |  |
| A0A1S9DX15 | Cutinase | OAory_01013580 | *Aspergillus oryzae (*Yellow koji mold) | 34 |  |
| A0A2P2H724 | Cutinase | AFLA70_51g004430 | *Aspergillus flavus (*strain ATCC MYA-384 / AF70) | 34 |  |
| A0A364MGP4 | Cutinase | BDV35DRAFT_161138 CA14_005054 F9C07_1000767 | *Aspergillus flavus* | 34 |  |
| A0A5N6VJ71 | Cutinase | BDV41DRAFT_568392 | *Aspergillus transmontanensis* | 34 |  |
| A0A7G5ITT9 | Cutinase | G4B84_002026 | *Aspergillus flavus* (strain ATCC 200026 / FGSC A1120 / IAM 13836 / NRRL 3357 / JCM 12722 / SRRC 167) | 34 |  |
| I8IKX6 | Cutinase | Ao3042_03951 | *Aspergillus oryzae* (strain 3.042) (Yellow koji mold) | 34 |  |
| A0A2I2FE37 | Cutinase | BDW47DRAFT_117073 | *Aspergillus candidus* | 22 |  |
| A0A5N6EKN1 | Cutinase | BDV33DRAFT_233170 | *Aspergillus novoparasiticus* | 34 |  |
| A0A2V5IL09 | cutinase | BO99DRAFT_442309 | *Aspergillus violaceofuscus* (strain CBS 115571) | 11 |  |
| A0A5N6UJ97 | Cutinase | BDV40DRAFT_11719 | *Aspergillus tamarii* | 34 |  |
| A0A5N7AB48 | Cutinase | BDV27DRAFT_170168 | *Aspergillus caelatus* | 34 |  |
| A0A2J5HD89 | Cutinase | BDW42DRAFT_198138 | *Aspergillus taichungensis* | 23 |  |
| A0A5N6DYL5 | Cutinase | BDV34DRAFT_187451 | *Aspergillus parasiticus* | 34 |  |
| A0A317X546 | cutinase | BO94DRAFT_461645 | *Aspergillus sclerotioniger* CBS 115572 | 31 |  |
| A0A5N7ERJ7 | Cutinase | BDV36DRAFT_305145 | *Aspergillus pseudocaelatus* | 34 |  |
| A0A319CL39 | cutinase | BO82DRAFT_132734 | *Aspergillus uvarum* CBS 121591 | 34 |  |
| A0A1L9X6A3 | cutinase | ASPACDRAFT_75480 | *Aspergillus aculeatus* (strain ATCC 16872 / CBS 172.66 / WB 5094) | 34 |  |
| A0A8H5ZVS9 | Cutinase | ETB97_007077 | *Aspergillus burnettii* | 31 |  |
| A0A395IA07 | cutinase | BO97DRAFT_179619 | *Aspergillus homomorphus* (strain CBS 101889) | 34 |  |
| A0A8G1W2X3 | cutinase | BO72DRAFT_452 | *Aspergillus fijiensis* CBS 313.89 | 34 |  |
| A0A8H6UYW6 | cutinase | CNMCM5793_003128 CNMCM6106_004216 | *Aspergillus hiratsukae* | 11 |  |
| A0A318ZQ58 | cutinase | BP01DRAFT_5084 | *Aspergillus saccharolyticus* JOP 1030-1 | 10 |  |
| A0A5N6U376 | Cutinase | BDV25DRAFT_45229 | *Aspergillus avenaceus* | 32 |  |
| A0A395H077 | cutinase | BO80DRAFT_338094 | *Aspergillus ibericus* CBS 121593 | 31 |  |
| A0A1R3RXW8 | cutinase | ASPCADRAFT_504731 | *Aspergillus carbonarius* (strain ITEM 5010) | 30 |  |
| A0A7R7WJX2 | cutinase | AKAW2_80022A | *Aspergillus kawachii (*White koji mold) *(Aspergillus awamori var. kawachi)* | 10 |  |
| A0A5N6WT77 | Cutinase | BDV39DRAFT_195627 | *Aspergillus sergii* | 8 |  |
| A0A2G7FJH2 | Cutinase | AARAC_001660 | *Aspergillus arachidicola* | 5 |  |
| A0A5N7BHQ0 | Cutinase | BDV26DRAFT_95767 | *Aspergillus bertholletiae* | 2 |  |
| Q5B2C1 | Cutinase 1 (Ancut1) (Cutin hydrolase 1) | cut1 AN5309 | *Emericella nidulans (*strain FGSC A4 / ATCC 38163 / CBS 112.46 / NRRL 194 / M139) *(Aspergillus nidulans)* | 43 |  |
| P52956 | Cutinase 1 (Cutin hydrolase 1) (L1) | cutL CutL1 AO090005000029 | *Aspergillus oryzae (*strain ATCC 42149 / RIB 40) (Yellow koji mold) | 34 |  |
| Q5AVY9 | Cutinase 2 (Ancut2) (Cutin hydrolase 2) | cut2 AN7541 | *Emericella nidulans (*strain FGSC A4 / ATCC 38163 / CBS 112.46 / NRRL 194 / M139) *(Aspergillus nidulans)* | 36 |  |
| Q5AX00 | Cutinase 3 (Ancut3) (Cutin hydrolase 3) | cut3 AN7180 | *Emericella nidulans (*strain FGSC A4 / ATCC 38163 / CBS 112.46 / NRRL 194 / M139) *(Aspergillus nidulans)* | 38 |  |
| C8VJF5 | Cutinase 4 (Ancut4) | cut4 ANIA_10346 | *Emericella nidulans* (strain FGSC A4 / ATCC 38163 / CBS 112.46 / NRRL 194 / M139) *(Aspergillus nidulans)* | 8 |  |
| A0A3M7JK39 | Esterase | CA14_011952 | *Aspergillus flavus* | 1 |  |
| A0A1F7ZYW7 | Esterase | ABOM_007423 | *Aspergillus bombycis* | 1 |  |
| A0A2G7G2E4 | Esterase | AARAC_010280 | *Aspergillus arachidicola* | 1 |  |
| A0A2I2FGC4 | Esterase | BDW47DRAFT_116473 | *Aspergillus candidus* | 2 |  |
| A0A2J5HQQ6 | Esterase | BDW42DRAFT_195067 | *Aspergillus taichungensis* | 2 |  |
| A0A2I1CZD4 | Esterase | P168DRAFT_328088 | *Aspergillus campestris* IBT 28561 | 1 |  |
| A0A8E0R1U9 | Esterase EstB | Aud_009318 IFM46972_07683 | *Aspergillus udagawae* | 2 |  |
| A0A8H3S9B7 | Esterase EstB | IFM51744_08255 | *Aspergillus udagawae* | 2 |  |
| A0A8H3RXU8 | Esterase EstB | IFM51744_04986 | *Aspergillus udagawae* | 2 |  |
| A0A8H3PDH8 | Esterase EstB | IFM46972_09273 | *Aspergillus udagawae* | 2 |  |
| B8NB10 | Esterase, putative | AFLA_043850 G4B84_010758 | *Aspergillus flavus* (strain ATCC 200026 / FGSC A1120 / IAM 13836 / NRRL 3357 / JCM 12722 / SRRC 167) | 1 |  |
| A2R2W3 | Probable cutinase 1 (Cutin hydrolase 1) | An14g02170 | *Aspergillus niger* (strain ATCC MYA-4892 / CBS 513.88 / FGSC A1513) | 44 |  |
| B8NCM8 | Probable cutinase 1 (Cutin hydrolase 1) | AFLA_039350 | *Aspergillus flavus* (strain ATCC 200026 / FGSC A1120 / IAM 13836 / NRRL 3357 / JCM 12722 / SRRC 167) | 43 |  |
| B0XRY3 | Probable cutinase 1 (Cutin hydrolase 1) | AFUB_025250 | *Aspergillus fumigatus* (strain CBS 144.89 / FGSC A1163 / CEA10) *(Neosartorya fumigata)* | 37 |  |
| Q4X1N0 | Probable cutinase 1 (Cutin hydrolase 1) | AFUA_2G09380 | *Aspergillus fumigatus (*strain ATCC MYA-4609 / CBS 101355 / FGSC A1100 / Af293) *(Neosartorya fumigata)* | 37 |  |
| A1DGN0 | Probable cutinase 1 (Cutin hydrolase 1) | NFIA_084890 | *Neosartorya fischeri* (strain ATCC 1020 / DSM 3700 / CBS 544.65 / FGSC A1164 / JCM 1740 / NRRL 181 / WB 181) *(Aspergillus fischerianus)* | 36 |  |
| A1CSZ4 | Probable cutinase 1 (Cutin hydrolase 1) | ACLA_081180 | *Aspergillus clavatus* (strain ATCC 1007 / CBS 513.65 / DSM 816 / NCTC 3887 / NRRL 1 / QM 1276 / 107) | 36 |  |
| Q0CD01 | Probable cutinase 1 (Cutin hydrolase 1) | ATEG_08433 | *Aspergillus terreus* (strain NIH 2624 / FGSC A1156) | 35 |  |
| B8MVS3 | Probable cutinase 1 (Cutin hydrolase 1) | AFLA_072700 | *Aspergillus flavus* (strain ATCC 200026 / FGSC A1120 / IAM 13836 / NRRL 3357 / JCM 12722 / SRRC 167) | 34 |  |
| B0Y537 | Probable cutinase 2 (Cutin hydrolase 2) | AFUB_071270 | *Aspergillus fumigatus (*strain CBS 144.89 / FGSC A1163 / CEA10) *(Neosartorya fumigata)* | 34 |  |
| Q4WQV2 | Probable cutinase 2 (Cutin hydrolase 2) | AFUA_4G14120 | *Aspergillus fumigatus* (strain ATCC MYA-4609 / CBS 101355 / FGSC A1100 / Af293) *(Neosartorya fumigata)* | 34 |  |
| A1CVT3 | Probable cutinase 2 (Cutin hydrolase 2) | NFIA_102190 | *Neosartorya fischeri* (strain ATCC 1020 / DSM 3700 / CBS 544.65 / FGSC A1164 / JCM 1740 / NRRL 181 / WB 181) *(Aspergillus fischerianus)* | 34 |  |
| Q2TZY7 | Probable cutinase 2 (Cutin hydrolase 2) | AO090011000665 | *Aspergillus oryzae (*strain ATCC 42149 / RIB 40) (Yellow koji mold) | 32 |  |
| B8NBB2 | Probable cutinase 2 (Cutin hydrolase 2) | AFLA_044870 | *Aspergillus flavus (*strain ATCC 200026 / FGSC A1120 / IAM 13836 / NRRL 3357 / JCM 12722 / SRRC 167) | 32 |  |
| A5ABE6 | Probable cutinase 2 (Cutin hydrolase 2) | An11g00110 | *Aspergillus niger* (strain ATCC MYA-4892 / CBS 513.88 / FGSC A1513) | 31 |  |
| Q0CES4 | Probable cutinase 2 (Cutin hydrolase 2) | ATEG_07810 | *Aspergillus terreus* (strain NIH 2624 / FGSC A1156) | 33 |  |
| Q2U199 | Probable cutinase 3 (Cutin hydrolase 3) | AO090011000113 | *Aspergillus oryzae* (strain ATCC 42149 / RIB 40) (Yellow koji mold) | 43 |  |
| A1D9W1 | Probable cutinase 3 (Cutin hydrolase 3) | NFIA_030250 | *Neosartorya fischeri* (strain ATCC 1020 / DSM 3700 / CBS 544.65 / FGSC A1164 / JCM 1740 / NRRL 181 / WB 181) *(Aspergillus fischerianus)* | 38 |  |
| B0YEP5 | Probable cutinase 3 (Cutin hydrolase 3) | AFUB_099910 | *Aspergillus fumigatus* (strain CBS 144.89 / FGSC A1163 / CEA10) *(Neosartorya fumigata)* | 36 |  |
| Q4W9Z4 | Probable cutinase 3 (Cutin hydrolase 3) | AFUA_4G03210 | *Aspergillus fumigatus* (strain ATCC MYA-4609 / CBS 101355 / FGSC A1100 / Af293) *(Neosartorya fumigata)* | 36 |  |
| Q0CNE3 | Probable cutinase 3 (Cutin hydrolase 3) | ATEG_04791 | *Aspergillus terreus (*strain NIH 2624 / FGSC A1156) | 37 |  |
| A1C9G0 | Probable cutinase 3 (Cutin hydrolase 3) | ACLA_055320 | *Aspergillus clavatus* (strain ATCC 1007 / CBS 513.65 / DSM 816 / NCTC 3887 / NRRL 1 / QM 1276 / 107) | 33 |  |
| Q0CW01 | Probable cutinase 4 (Cutin hydrolase 4) | ATEG_02133 | *Aspergillus terreus* (strain NIH 2624 / FGSC A1156) | 39 |  |
| Q0CRP4 | Probable cutinase 5 (Cutin hydrolase 5) | ATEG_03640 | *Aspergillus terreus* (strain NIH 2624 / FGSC A1156) | 36 |  |
| A0A2P2HGU2 | Putative esterase | AFLA70_104g002230 | *Aspergillus flavus* (strain ATCC MYA-384 / AF70) | 2 |  |
| A0A7G5KHI7 | Putative esterase | F9C07_5712 | *Aspergillus flavus* | 1 |  |
| A0A7U2QT50 | Putative transesterase | F9C07_6953 | *Aspergillus flavus* | 2 |  |
| A0A7U2MVL1 | Putative transesterase | F9C07_10476 | *Aspergillus flavus* | 2 |  |
| A0A2P2H2C0 | Putative transesterase (LovD) | AFLA70_189g002520 | *Aspergillus flavus* (strain ATCC MYA-384 / AF70) | 2 |  |
| A0A370BF56 | Transesterase | M747DRAFT_291061 | *Aspergillus niger* ATCC 13496 | 2 |  |
| A0A3M7JGM9 | Transesterase | CA14_006281 | *Aspergillus flavus* | 2 |  |
| A0A2P2GZT8 | Transesterase | AFLA70_49g004131 | *Aspergillus flavus* (strain ATCC MYA-384 / AF70) | 2 |  |
| A0A2G7FK89 | Transesterase | AARAC_006061 | *Aspergillus arachidicola* | 1 |  |
| A0A2G7FTA1 | Transesterase (LovD) | AARAC_001835 | *Aspergillus arachidicola* | 2 |  |
| A0A3M7JSE7 | Transesterase (LovD) | CA14_001688 | *Aspergillus flavus* | 2 |  |
| A0A0J5SF64 | Transesterase (LovD) | Y699_08956 | *Aspergillus fumigatus* Z5 | 2 |  |
| A0A2G7G5L1 | Transesterase (LovD) | AARAC_001565 | *Aspergillus arachidicola* | 2 |  |
| A0A2P2HSS5 | Transesterase (LovD) | AFLA70_70g003011 | *Aspergillus flavus* (strain ATCC MYA-384 / AF70) | 2 |  |
| B8NEQ7 | Transesterase (LovD), putative | AFLA_063440 | *Aspergillus flavus* (strain ATCC 200026 / FGSC A1120 / IAM 13836 / NRRL 3357 / JCM 12722 / SRRC 167) | 2 |  |
| B8NR26 | Transesterase (LovD), putative | AFLA_004100 | *Aspergillus flavus* (strain ATCC 200026 / FGSC A1120 / IAM 13836 / NRRL 3357 / JCM 12722 / SRRC 167) | 2 |  |
